# Supplementary material
Source: ML conference proceedings conference paper supplement (https://proceedings.neurips.cc/paper_files/paper/2020/hash/31784d9fc1fa0d25d04eae50ac9bf787-Abstract.html)
Supplement: Supplementary file [file 31784d9fc1fa0d25d04eae50ac9bf787-Supplemental.pdf]

## A Proof of Theorem 2

*Proof.* First, we prove that the constructed circuit is a selective-SPN by showing it is selective and decomposable. We maintain these invariants at each layer: 1) the array  $D$  store  $cn$  nodes where  $c$  is the number of nodes per partition and  $n$  is the number of partitions and 2) the  $c$  nodes of each partition have disjoint support. The invariants hold trivially at the leaf layer with  $c = 2$ . At a product layer, we do a Cartesian product between the  $c$  nodes of partition  $2i$  and the  $c$  nodes of partition  $2i + 1$  for  $i \in [0, n/2)$  (lines 13-17). Since the children of each partition have disjoint support, the Cartesian product of children from two partitions forms  $c^2$  product nodes with disjoint support. At a sum layer, each sum node is a mixture of  $r$  children and each child is assigned to only one sum node, so setting  $c \leftarrow c/r$  maintains invariant 1 and 2 (lines 8-11). Therefore, each sum node is selective, each product node is decomposable, and the constructed circuit is a valid selective-SPN.

To finish, we show that the constructed selective-SPN has size  $O(kn)$ . At every sum layer, we set  $r$  so that there are at most  $k^{1/2}$  sum nodes per partition. At every product layer, we have  $c^2 \leq k$  product nodes per partition (line 7). It can be seen that there cannot be more than 2 consecutive sum layers, and that at every product layer the number of partitions halves. The total number of nodes/edges is therefore  $O(k(n + \frac{n}{2} + \dots + 1)) = O(kn)$ . Each node/edge can be constructed in constant time, so the time complexity also scales as  $O(kn)$ .  $\square$
